# Supplementary material
Source: Springer Nature journal article supplement (https://www.springermedizin.de/resource/supplementary/12916_2012_764_MOESM9_ESM.pdf/9598658)

A) Men

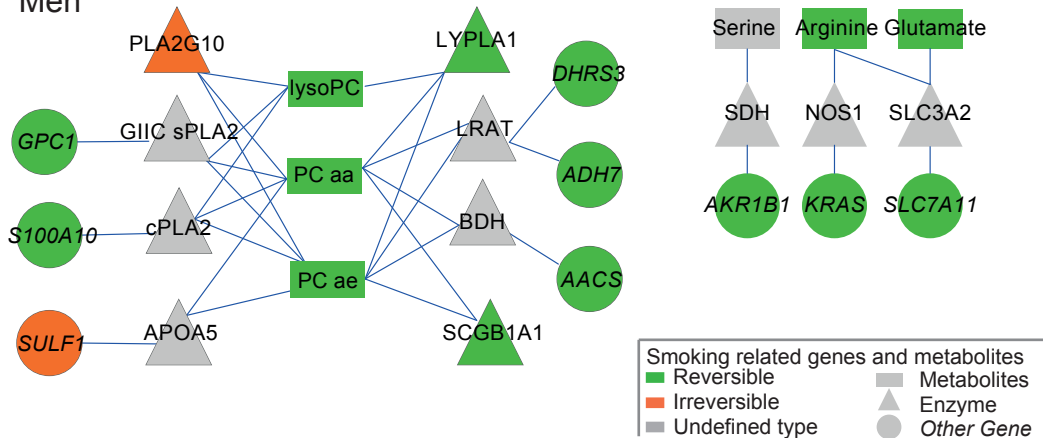

Women

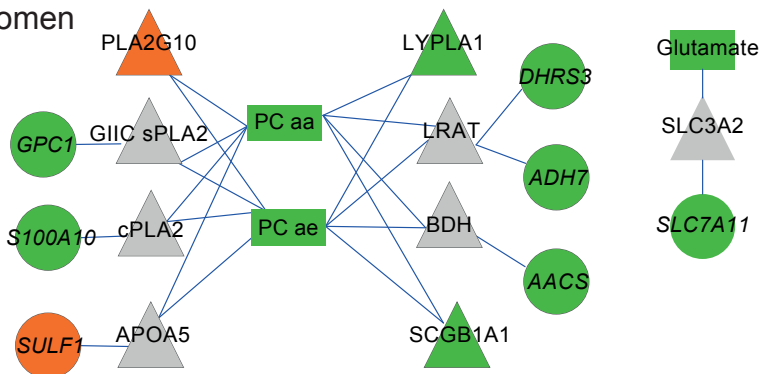

B)

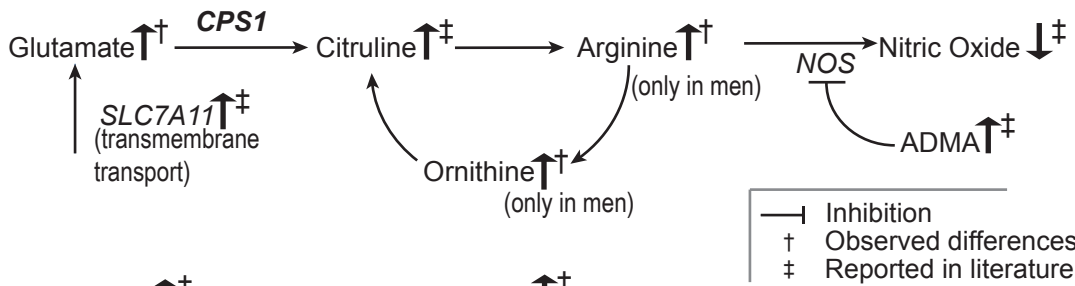

C)

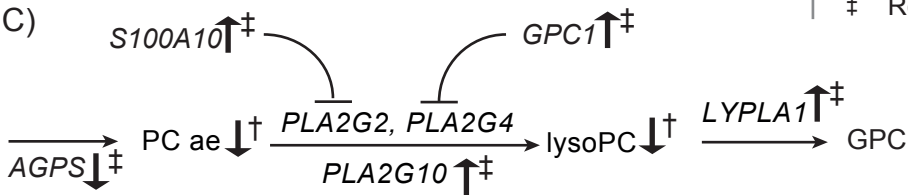

Supplement: MOESM9 [file 9598658]
